# Supplementary material for: Improved out-of-plane thermal conductivity of boron nitride nanosheet-filled polyamide 6/polyethylene terephthalate composites by a rapid solidification method
Source: Royal Society of Chemistry journal article supplement (doi:10.1039/d2ma00985d), 2023-01-01
Supplement: d2ma00985d1.pdf [file d2ma00985d1.pdf]

## Supporting Information

### Improved out-of-plane thermal conductivity of boron nitride nanosheets filled polyamide

#### 6/polyethylene terephthalate composites by rapid solidification method

Qingchong Xu <sup>a,b</sup>, Zhenxing Chen <sup>a,b,c,\*</sup>, Xinxin Li <sup>a</sup>, Jiaxin Hu <sup>a</sup>, Yanling Liao <sup>a,b</sup>, Yongfeng Liu <sup>a</sup>,

Long Li <sup>b</sup>, Shiyang Wei <sup>b</sup>, Ziwei Li <sup>d,\*</sup>

<sup>a</sup> School of Chemical Engineering and Technology, Sun Yat-Sen University, Zhuhai 519082, PR China

<sup>b</sup> School of Chemistry and Environment, Jiaying University, Meizhou 514015, PR China

<sup>c</sup> The Key Laboratory of Low-Carbon Chemistry & Energy Conservation of Guangdong Province, Guangzhou 510275, PR China

<sup>d</sup> College of Materials Science and Engineering, Guilin University of Technology, Guilin 541000, PR China

\*Corresponding author: E-mail: [2764927916@qq.com](mailto:2764927916@qq.com)

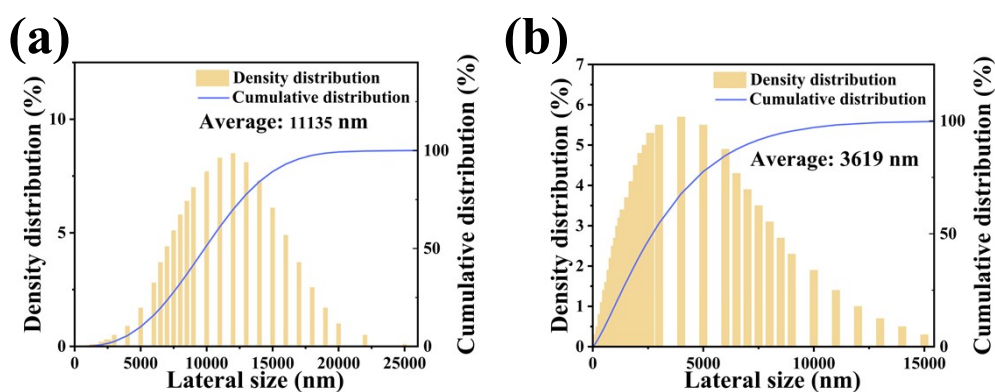

Fig S1. Particle size distributions of raw h-BN (a) and BNNS-OH (b).

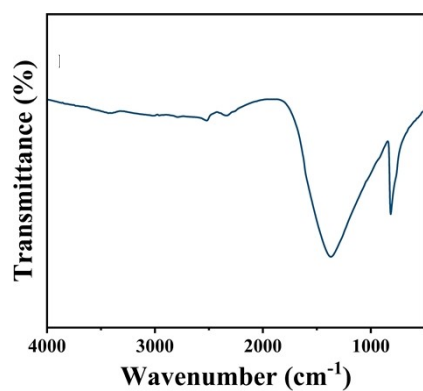

Fig S2. FT-IR spectrum of h-BN by reaction with the ternary blend organic silanol.

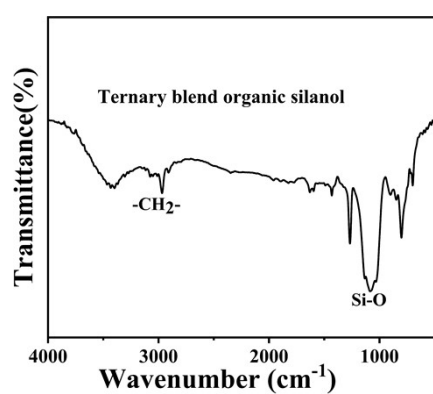

Fig S3. FT-IR spectrum of ternary blend organic silanol.

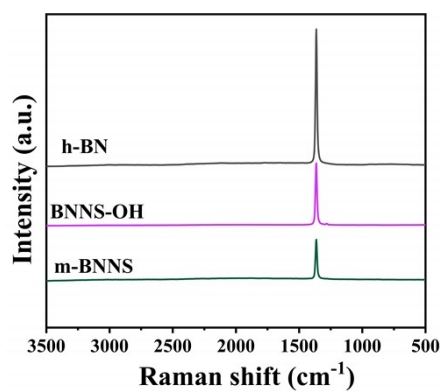

Fig S4. Raman spectra of h-BN, BNNS-OH and m-BNNS;

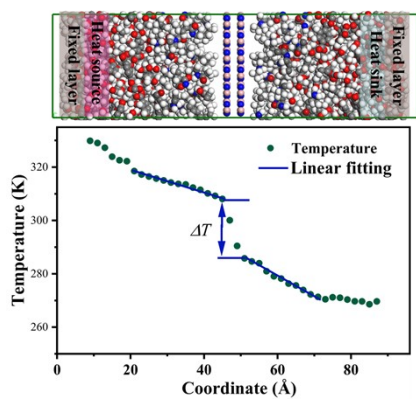

Fig S5. Temperature profile along the z direction in thermal equilibrium.
